# Supplementary material for: Complex Inflammation mRNA-Related Response in ALS Is Region Dependent
Source: Neural Plast. 2015 Aug 2;2015:573784. doi: 10.1155/2015/573784 (PMC4537753; doi:10.1155/2015/573784)
Supplement: Supplementary file 1 — No significant differences between mRNA expression in the anterior lumbar spinal cord was observed between samples from patients diagnosed or not for AD either in control or ALS groups. Values are calculated with the ΔΔCT method, using GUS-B as housekeeping gene and control samples as references. N.S.: Not significant. [file 573784.f1.xls]

## Sheet: Supplementary Table I
			Spinal cord
			Control			Control-AD			p value	ALS			ALS-AD			p value
Pro-inflammatory signaling	Complement system	C1QTNF7	0.86	±	0.06	1.19	±	0.23	n.s.	0.77	±	0.25	0.34	±	0.1	n.s.
		C3AR1	1.13	±	0	0.96	±	0.04	n.s.	0.8	±	0.17	0.8	±	0.17	n.s.
	Colony stimulating factor	CSF3R	1.68	±	0	0.86	±	0.13	n.s.	1.06	±	0.2	2.14	±	1.05	n.s.
	Toll-like receptor	TLR4	1.58	±	0.96	1.14	±	0.38	n.s.	1.07	±	0.09	0.84	±	0.22	n.s.
		TLR7	0.45	±	0	1.23	±	0.09	n.s.	2.19	±	0.38	1.88	±	0.38	n.s.
	Cathepsins	CTSC	0.83	±	0.24	1.25	±	0.22	n.s.	1.75	±	0.2	1.55	±	0.52	n.s.
		CTSS	1.09	±	0.32	1.02	±	0.11	n.s.	1.54	±	0.19	3.18	±	0.28	n.s.
	Interleukins	IL1B	0.97	±	0	1.37	±	0.56	n.s.	1.35	±	0.46	0.45	±	0.24	n.s.
		IL6	0.77	±	0.56	1	±	0.24	n.s.	3.7	±	1.06	2.1	±	1.29	n.s.
		IL6ST	1.22	±	0.09	0.97	±	0.16	n.s.	0.87	±	0.06	0.71	±	0.05	n.s.
		IL8	2.89	±	0	1.23	±	0.58	n.s.	1.3	±	0.44	1.74	±	1.56	n.s.
	TNF family	TNF-a	0.62	±	0.13	1.44	±	0.27	n.s.	0.93	±	0.12	1.1	±	0	n.s.
		TNFRSF1A	1.15	±	0	1	±	0.2	n.s.	0.69	±	0.05	0.75	±	0.09	n.s.
Anti-inflammatory signaling	IL-10 family	IL10	1.07	±	0.53	1.27	±	0.26	n.s.	1.48	±	0.21	1.7	±	0.41	n.s.
		IL10RA	1.13	±	0.28	1.04	±	0.15	n.s.	1.35	±	0.21	2.14	±	0.43	n.s.
	TGF beta family	TGFB1	1.06	±	0.06	0.98	±	0.09	n.s.	1.58	±	0.35	2.25	±	0.01	n.s.
		TGFB2	1.08	±	0	0.99	±	0.08	n.s.	1.47	±	0.24	2.3	±	1.05	n.s.
